# Supplementary material for: Global high-resolution drought indices for 1981–2022
Source: Copernicus journal article supplement (doi:10.5194/essd-15-5449-2023), 2023-12-04
Supplement: Supplementary file 1 [file essd-15-5449-2023-supplement.pdf]

Supplement of Earth Syst. Sci. Data, 15, 5449–5466, 2023  
<https://doi.org/10.5194/essd-15-5449-2023-supplement>  
© Author(s) 2023. CC BY 4.0 License.

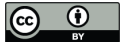

Open Access  
Earth System  
Science  
Data

*Supplement of*

## **Global high-resolution drought indices for 1981–2022**

**Solomon H. Gebrechorkos et al.**

*Correspondence to:* Solomon H. Gebrechorkos ([solomon.gebrechorkos@ouce.ox.ac.uk](mailto:solomon.gebrechorkos@ouce.ox.ac.uk))

The copyright of individual parts of the supplement might differ from the article licence.

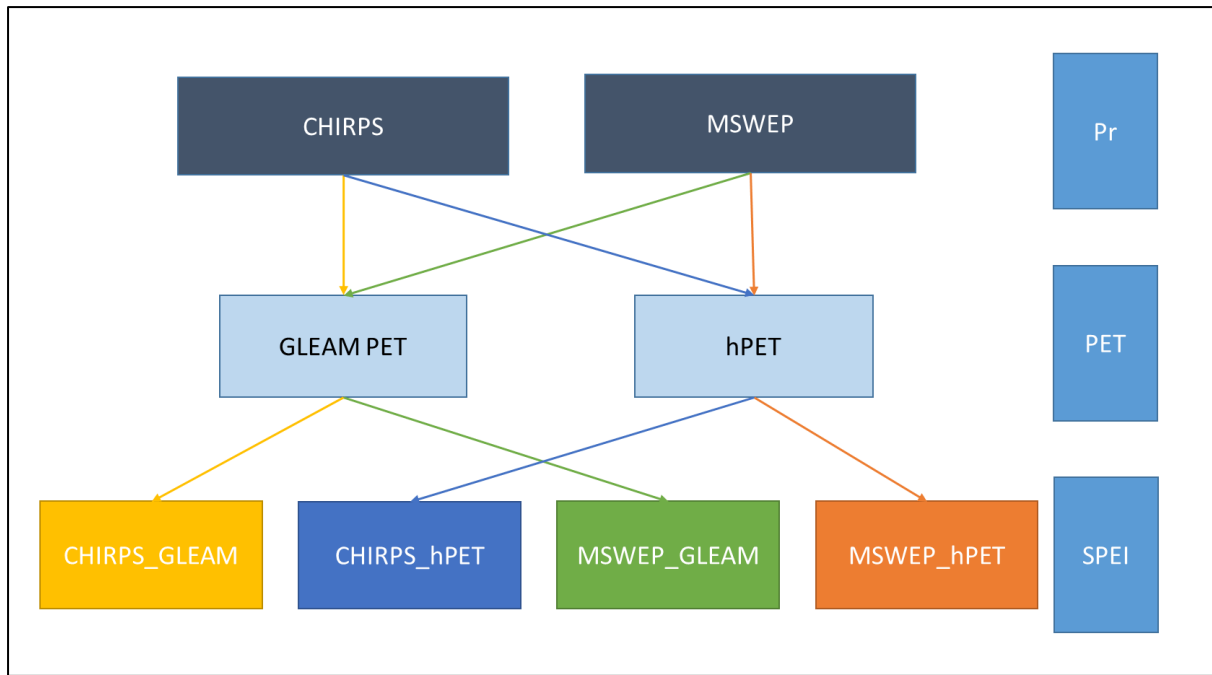

Figure S1. Overview of the input precipitation (Pr) and potential evapotranspiration (PET) and output SPEI.

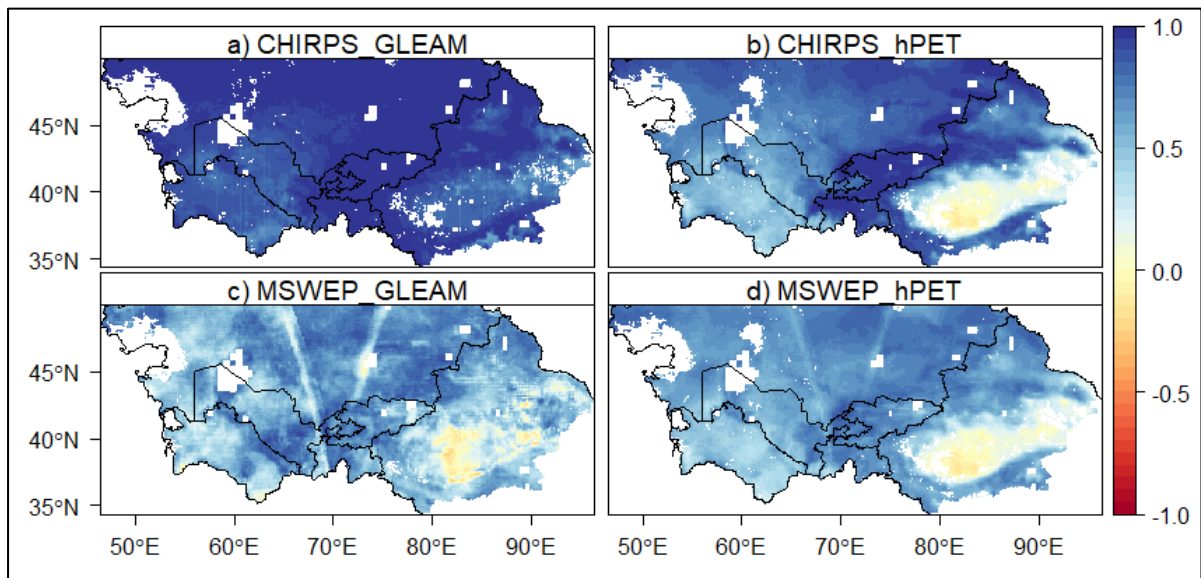

Figure S2. Temporal correlation between the new high-resolution SPEI (SPEI-HR) based on (a) CHIRPS\_GLEAM, (b) CHIRPS\_hPET, (c) MSWEP-GLEAM, and (d) MSWEP-hPET, and Central Asia SPEI (CA-SPEI) for SPEI-1 month during the period 1981–2018.

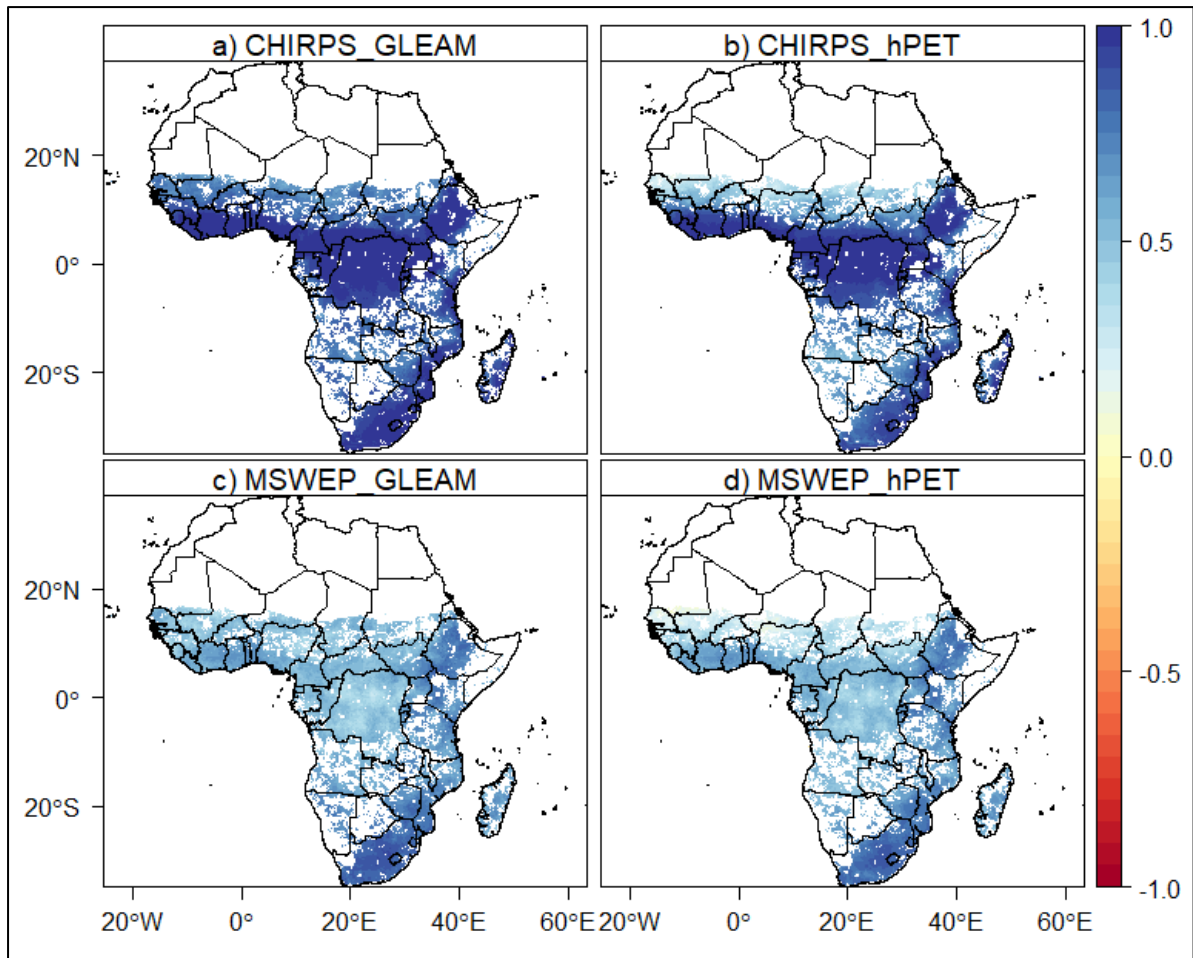

Figure S3. Temporal correlation between the new high-resolution SPEI (SPEI-HR) based on (a) CHIRPS\_GLEAM, (b) CHIRPS\_hPET, (c) MSWEP-GLEAM, and (d) MSWEP-hPET, and Pan African SPEI (AF-SPEI) for SPEI-1 month during the period 1981–2016.
